# Supplementary material
Source: PubMed Central journal article supplement (PMC2941276)
Supplement: 1003904107_pnas.1003904107_SI.pdf [file 1003904107_pnas.1003904107_SI.pdf]

# Supporting Information

Daulton et al. 10.1073/pnas.1003904107

Table S1. Similarities between fcc-Cu and Cu<sub>2</sub>O with the proposed *n*-diamond and *i*-carbon structures

| "n diamond" |                |                 |                 |                    |                 | fcc-Cu space group<br>225 a = 3.6149 Å | Cu <sub>2</sub> O space group<br>201 a = 4.266 Å | "i carbon" |                   |                 |                 |                 |                 |
|-------------|----------------|-----------------|-----------------|--------------------|-----------------|----------------------------------------|--------------------------------------------------|------------|-------------------|-----------------|-----------------|-----------------|-----------------|
| Indices     | Calculated, Å* | Reported, Å (1) | Reported, Å (2) | Reported, Å (3, 4) | Reported, Å (5) | Indices                                | Calculated, Å                                    | Indices    | Calculated, Å (6) | Reported, Å (1) | Reported, Å (2) | Reported, Å (3) | Reported, Å (4) |
| 111         | 2.053          | 2.08            | 2.10            | 2.06               | 2.067           | 111                                    | 2.087                                            | 110        | 3.020             | 3.04            | 3.02            | 3.03            | 3.04            |
| 200         | 1.778          | 1.80            | 1.81            | 1.78               | 1.791           | 200                                    | 1.808                                            | 111        | 2.463             | 2.55            | 2.48            | 2.49            | 2.42            |
| 220         | 1.257          | 1.28            | 1.28            | 1.26               | 1.261           | 220                                    | 1.278                                            | 200        | 2.133             | 2.12            | 2.12            | 2.13            | 2.08            |
| 311         | 1.072          | 1.09            | 1.09            | 1.07               | 1.078           | 311                                    | 1.090                                            | 211        | 1.742             | 1.82            | 1.77            | 1.78            | 1.70            |
| 222         | 1.027          | 1.05            | 1.05            | 1.04               | 1.032           | 222                                    | 1.044                                            | 220        | 1.510             | 1.51            | 1.51            | 1.59            | 1.49            |
| 400         | 0.889          | 0.903           |                 | 0.898              | 0.892           | 400                                    | 0.904                                            | 311        | 1.286             | 1.30            | 1.29            | 1.29            | 1.26            |
| 331         | 0.816          | 0.824           | 0.829           | 0.818              | 0.817           | 331                                    | 0.830                                            | 222        | 1.232             |                 |                 |                 | 1.19            |
| 420         | 0.795          | 0.808           | 0.808           | 0.796              | 0.796           | 420                                    | 0.808                                            | 400        | 1.067             | 1.10            |                 | 1.09            |                 |
| 422         | 0.726          | 0.735           |                 | 0.726              | 0.727           | 422                                    | 0.738                                            | 331        | 0.978             |                 |                 | 1.05            |                 |
| 511/333     | 0.684          | 0.673           |                 | 0.683 (4)          | 0.686           | 511/333                                | 0.695                                            | 420        | 0.954             |                 |                 | 0.916           |                 |
| 440         | 0.629          |                 |                 |                    | 0.630           | 440                                    | 0.639                                            | 422        | 0.870             | 0.906           |                 | 0.847           |                 |
| 531         | 0.601          |                 |                 |                    | 0.601           | 531                                    | 0.611                                            | 511        | 0.821             | 0.835           |                 |                 |                 |
| 600/420     | 0.593          |                 |                 |                    |                 | 600/420                                | 0.603                                            |            |                   |                 |                 |                 |                 |
| 620         | 0.562          |                 |                 |                    |                 | 620                                    | 0.571                                            |            |                   |                 |                 |                 |                 |
| 533         | 0.542          |                 |                 |                    |                 | 533                                    | 0.551                                            |            |                   |                 |                 |                 |                 |
| 622         | 0.536          |                 |                 |                    |                 | 622                                    | 0.545                                            |            |                   |                 |                 |                 |                 |
| 444         | 0.513          |                 |                 |                    |                 | 444                                    | 0.522                                            |            |                   |                 |                 |                 |                 |
| 551/711     | 0.498          |                 |                 |                    |                 | 551/711                                | 0.506                                            |            |                   |                 |                 |                 |                 |

\*3C diamond reflections including kinematically forbidden reflections.

1. Yamada K, Sawaoka AB (1994) Very small spherical crystals of distorted diamond found in a detonation product of explosive/graphite mixtures and their formation mechanism. *Carbon* 32:665–673.
2. Burkhard G, et al. (1994) Carbon phase transition by dynamic shock compression of a copper/graphite powder mixture. *Jpn J Appl Phys* 33:L876–L879.
3. Djerdj I, et al. (2006) Transmission electron microscopy study of carbon nanophases produced by ion beam implantation. *Mat Sci Eng C-Bio* 5 26:1202–1206.
4. Hirai H, Kondo K-I (1991) Modified phases of diamond formed under shock compression and rapid quenching. *Science* 253:773–774.
5. Konyashin I, et al. (2006) A new hard allotropic form of carbon: Dream or reality? *Int J Refract Met H* 24:17–23.
6. Golden TD et al. (1996) Electrochemical deposition of Copper(I) oxide films. *Chem Mater* 8:2499–2504.

Table S2. Similarities between graphene with the proposed *p*-diamond structure

| Graphene |               |              |                       | "p diamond" |                 |                    |
|----------|---------------|--------------|-----------------------|-------------|-----------------|--------------------|
| Indices  | Calculated, Å | Presolar, Å* | Younger–Dryas, Å* (1) | Indices     | Reported, Å (2) | Reported, Å (3, 4) |
| 100      | 2.130         | 2.033 (6)    | 2.076 (4)             | 111         | 2.08            | 2.08               |
| 110      | 1.230         | 1.230 (2)    | 1.222 (2)             | 221         | 1.20            | 1.21               |
| 200      | 1.065         | 1.069 (3)    | 1.061 (2)             | 222         | 1.04            | 1.05               |
| 120      | 0.805         | 0.807 (2)    | 0.798 (1)             | 412         | 0.79            | 0.791              |
| 300      | 0.710         | 0.709 (2)    | 0.705 (1)             | 413         | 0.70            | 0.703              |
|          |               |              |                       | 333         | 0.69            | 0.672              |
| 220      | 0.615         | 0.616 (1)    | 0.609 (1)             | 334         | 0.62            |                    |
| 130      | 0.591         | 0.593 (1)    | 0.584 (1)             | 703         | 0.59            |                    |
| 400      | 0.533         | 0.534 (1)    | 0.525 (1)             |             |                 |                    |
| 230      | 0.489         | 0.489 (1)    | 0.479 (1)             |             |                 |                    |
| 140      | 0.465         | 0.465 (1)    | 0.455 (1)             |             |                 |                    |
| 500      | 0.426         | 0.427 (1)    | 0.418 (1)             |             |                 |                    |
| 330      | 0.410         | 0.410 (1)    | 0.397 (1)             |             |                 |                    |

\*Detonation synthesized nanodiamonds were used to calibrate diffraction camera length of microscope. Values in parenthesis are the measurement error (in the least significant digit) based on standard error of replicate measurements and the error in camera length calibration ( $\pm 0.2\%$ ).

1. Hexagonal edge length varies slightly from grain to grain.
2. Kleiman J, et al. (1984) Shock compression and flash heating of graphite/metal mixtures at temperatures up to 3200 K and pressures up to 25 GPa. *J Appl Phys* 56:1440–1454.
3. Yamada K, et al. (1999) Nanostructure and formation mechanism of proto diamond shock-synthesized from graphite. *Carbon* 37:275–280.
4. Yamada K, Tanabe Y, Sawaoka, AB (2000) Allotropes of carbon shock synthesized at pressures up to 15 GPa. *Philos Mag A* 80:1811–1828.
